# Supplementary material for: Syntheses, crystal structures and magnetic properties of two low-dimensional cyano-bridged CrIII–MnII/III assemblies
Source: Royal Society of Chemistry journal article supplement (doi:10.1039/c2nj20966g), 2012-01-01
Supplement: c2nj20966g.pdf [file c2nj20966g.pdf]

## Electronic Supplementary Information

# Syntheses, Crystal Structures and Magnetic Properties of Two Low-dimensional Cyano-bridged Cr<sup>III</sup>-Mn<sup>II/III</sup> Assemblies

Xiaoping Shen <sup>a,\*</sup>, Qian Zhang <sup>a</sup>, Hongbo Zhou <sup>a</sup>, Hu Zhou <sup>b</sup>, Aihua Yuan <sup>b</sup>

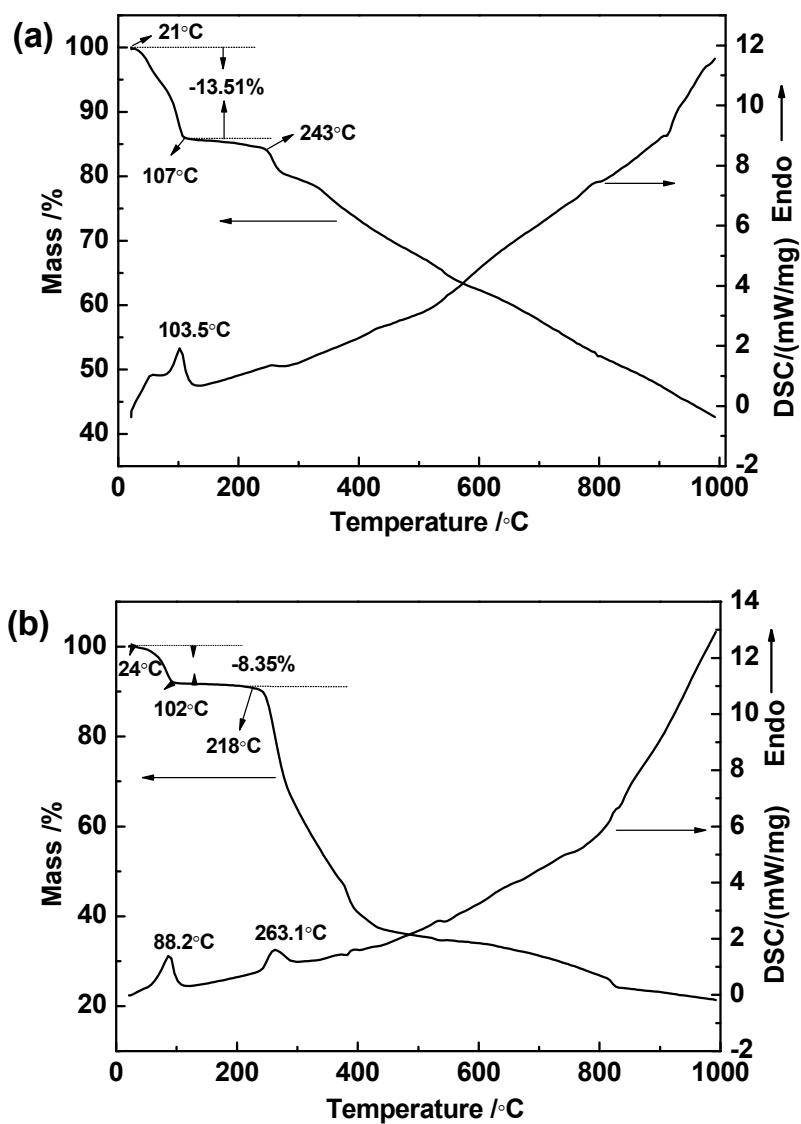

Fig. S1 TG-DSC curves of complexes of 1 (a) and 2 (b).

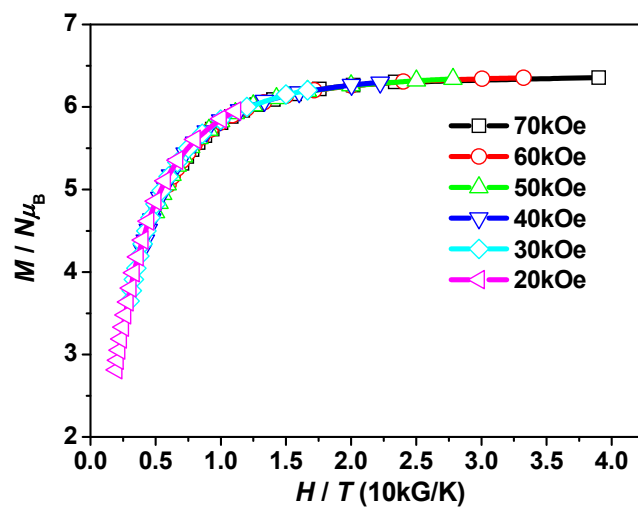

Fig. S2 Plots of reduced magnetization vs.  $H/T$  in 1.8-10 K for complex 2.

**Table S1** Selected bond lengths and angles for **1**

| Bond distances(Å) |            |               |            |
|-------------------|------------|---------------|------------|
| Mn3-O1            | 1.876(2)   | Mn1-N13       | 1.988(3)   |
| Mn3-O2            | 1.870(2)   | Cr1-C18       | 2.068(3)   |
| Mn3-N1            | 1.994(3)   | Cr1-C19       | 2.047(3)   |
| Mn3-N2            | 1.975(2)   | Cr1-C20       | 2.098(3)   |
| Mn3-N3            | 2.312(3)   | Cr1-C18B      | 2.068(3)   |
| Mn3-N14           | 2.359(3)   | Cr1-C19B      | 2.047(3)   |
| Mn2-N10           | 1.975(3)   | Cr1-C20B      | 2.098(3)   |
| Mn2-O4            | 1.870(2)   | Cr2-C23       | 2.069(4)   |
| Mn2-O5            | 2.256(2)   | Cr2-C21A      | 2.080(3)   |
| Mn2-O3            | 1.880(2)   | Cr2-C22       | 2.053(3)   |
| Mn2-N9            | 1.973(3)   | Cr2-C21       | 2.080(3)   |
| Mn2-O6            | 2.305(2)   | Cr2-C22A      | 2.053(3)   |
| Mn1-O8            | 1.884(2)   | Cr2-C23A      | 2.069(4)   |
| Mn1-O7            | 1.875(2)   | N4-C19        | 1.165(4)   |
| Mn1-O10           | 2.316(2)   | N7-C22        | 1.168(4)   |
| Mn1-N6            | 1.967(3)   | N8-C23        | 1.118(5)   |
| Mn1-O9            | 2.257(2)   | N14-C21       | 1.131(4)   |
| Bond angle(°)     |            |               |            |
| O1-Mn3-O2         | 92.27(10)  | O7-Mn1-N6     | 173.24(11) |
| O-Mn-N1           | 92.82(12)  | O7-Mn1-N13    | 92.06(11)  |
| O1-Mn3-N2         | 174.90(11) | O10-Mn1-N13   | 93.21(10)  |
| O1-Mn3-N3         | 92.01(11)  | O9-Mn1-N6     | 91.71(10)  |
| O1-Mn3-N14        | 94.72(9)   | O8-Mn1-N6     | 91.32(11)  |
| O2-Mn3-N1         | 174.90(12) | O8-Mn1-N13    | 173.11(11) |
| O2-Mn3-N2         | 92.80(11)  | C18-Cr1-C18B  | 180.00     |
| O2-Mn3-N3         | 94.08(10)  | C18-Cr1-C20   | 88.12(12)  |
| O2-Mn3-N14        | 93.00(10)  | C19-Cr1-C19B  | 180.00     |
| N1-Mn3-N2         | 82.10(12)  | C19-Cr1-C20   | 89.95(13)  |
| N1-Mn3-N3         | 85.88(11)  | C20-Cr1-C20B  | 180.00     |
| N1-Mn3-N14        | 86.44(11)  | C19B-Cr1-C20B | 89.95(13)  |
| N2-Mn3-N3         | 87.15(11)  | C21-Cr2-C23   | 89.74(13)  |
| N2-Mn3-N14        | 85.50(10)  | C22-Cr2-C22A  | 180.00     |
| N3-Mn3-N14        | 170.02(10) | C22-Cr2-C23A  | 91.92(14)  |
| O3-Mn2-N9         | 91.82(11)  | C21-Cr2-C21A  | 180.00     |
| O3-Mn2-N10        | 172.09(11) | C22-Cr2-C23   | 88.08(14)  |
| O4-Mn2-O5         | 92.96(9)   | C23-Cr2-C23A  | 180.00     |
| O4-Mn2-O6         | 88.83(9)   | Cr2-C21-N14   | 175.7(3)   |
| O4-Mn2-N9         | 173.73(11) | Cr2 -C22-N7   | 177.9(3)   |
| O4-Mn2-N10        | 92.90(11)  | Cr2-C23-N8    | 179.5(3)   |
| Cr1-C20-N5        | 177.1(3)   | Cr1-C18-N3    | 173.3(3)   |
| Cr1-C19-N4        | 177.6(3)   |               |            |

**Table S2** Hydrogen-bond geometry (Å, °) for **1**

| D-H···A         | D-H    | H···A  | D···A    | D-H···A |
|-----------------|--------|--------|----------|---------|
| O5--H5B..O14    | 0.8500 | 2.1100 | 2.762(4) | 133.00  |
| O6--H6A..N5     | 0.8500 | 2.0700 | 2.780(4) | 140.00  |
| O9--H9C..O12    | 0.9700 | 2.2300 | 2.741(5) | 111.00  |
| O10--H10A..N7   | 0.8500 | 1.9700 | 2.805(3) | 168.00  |
| O12--H12B..O14  | 0.8500 | 2.3800 | 2.752(5) | 107.00  |
| O12--H12-D..O14 | 0.8500 | 2.3700 | 2.752(5) | 108.00  |
| O13--H13C..O14  | 0.8500 | 2.1300 | 2.829(7) | 140.00  |
| O14--H14A..O12  | 0.8500 | 2.4400 | 2.752(5) | 102.00  |
| O14--H14D..O13  | 0.8500 | 1.9800 | 2.829(7) | 180.00  |

Symmetry transformations used to generate equivalent atoms: A = -x, 1-y, -z; B = -x, 1-y, 1-z

**Table S3** Selected bond lengths and angles for **2**

| Bond distances(Å) |            |               |            |
|-------------------|------------|---------------|------------|
| Mn1-Cl1           | 2.472(5)   | Cr1-C22       | 2.041(5)   |
| Mn1-O1            | 2.113(14)  | Cr1-C23       | 2.017(6)   |
| Mn1-N1            | 2.177(4)   | Cr1-C21A      | 2.091(4)   |
| Mn1-N2            | 2.249(4)   | Cr1-C22A      | 2.041(5)   |
| Mn1-N3            | 2.224(4)   | Cr1-C23A      | 2.017(5)   |
| Mn1-N4            | 2.290(4)   | N5-C21        | 1.195(5)   |
| Mn1-N5            | 2.113(3)   | N6-C22        | 1.170(7)   |
| Cr1-C21           | 2.091(4)   | N7-C23        | 1.186(7)   |
| Bond angles(°)    |            |               |            |
| Cl1-Mn1-N1        | 93.49(16)  | C21-Cr1-C22   | 95.31(17)  |
| Cl1-Mn1-N2        | 97.49(17)  | C21-Cr1-C23   | 91.0(2)    |
| Cl1-Mn1-N3        | 93.58(16)  | C21-Cr1-C21A  | 174.09(17) |
| Cl1-Mn1-N4        | 166.08(17) | C21-Cr1-C22A  | 88.94(17)  |
| Cl1-Mn1-N5        | 95.43(15)  | C21-Cr1-C23A  | 84.8(2)    |
| O1-Mn1-N1         | 102.3(4)   | C22-Cr1-C23   | 91.7(2)    |
| O1-Mn1-N2         | 97.5(4)    | C21A-Cr1-C22  | 88.94(17)  |
| O1-Mn1-N3         | 95.2(4)    | C22-Cr1-C23A  | 179.7(2)   |
| O1-Mn1-N4         | 165.2(4)   | C21A-Cr1-C23  | 84.8(2)    |
| O1-Mn1-N5         | 86.2(3)    | C22A-Cr1-C23  | 179.74(19) |
| N1-Mn1-N2         | 72.20(16)  | C23-Cr1-C23A  | 88.6(2)    |
| N1-Mn1-N3         | 96.22(15)  | C21A-Cr1-C22A | 95.31(17)  |
| N2-Mn1-N3         | 164.38(17) | Cr1-C21-N5    | 177.0(4)   |
| N2-Mn1-N4         | 96.02(16)  | Cr1-C22-N6    | 173.0(4)   |
| N3-Mn1-N4         | 72.53(15)  | Cr1-C23-N7    | 177.9(5)   |
| N4-Mn1-N5         | 86.63(13)  | Mn1-N5-C21    | 146.6(3)   |

Symmetry transformations used to generate equivalent atoms: A = -x, 2-y, z
